# Supplementary material
Source: ML conference proceedings conference paper supplement (https://openaccess.thecvf.com/content/CVPR2023/html/Cheng_M6Doc_A_Large-Scale_CVPR_2023_paper.html)
Supplement: Supplementary file 1 [file Cheng_M6Doc_A_Large-Scale_CVPR_2023_supplemental.pdf]

# Supplementary Material

## A. Data annotation process

Firstly, before the annotation process, we conducted a pre-annotation process. We provided 500 clean document images, 500 annotation samples, and a preliminary version of the annotation guidelines to 47 annotators. They performed labeling on the same images without discussion.

Secondly, we compared each annotator’s annotation result with the samples and quantified the matching degree and errors. If there are significant differences in the labeling of the same document element by different annotators, we will research the relevant knowledge to ensure the most accurate label and update the annotation guideline.

Finally, in the final annotation process, all annotators performed annotation according to the final, refined version of the guideline (with clear annotation requirements for all confusing cases). When annotators encounter document elements in uncertain categories, we will provide timely feedback to ensure consistency in labeling. Following this way, in the final check process, the percentage of inconsistent annotations that we should resolve is within 5%.

## B. Impact of Document Size

To investigate the effect of dataset size on model performance, we trained Mask R-CNN on training sets of different proportions of  $M^6Doc$  and evaluated the performance on a test set. As shown in Figure 1, the mean accuracy (mAP) scores initially show rapid growth, and then slowly grow as the training dataset reaches sizes of 90% and 100%. This suggests that the performance of the model can still be improved if we continue to increase the size of the  $M^6Doc$  dataset.

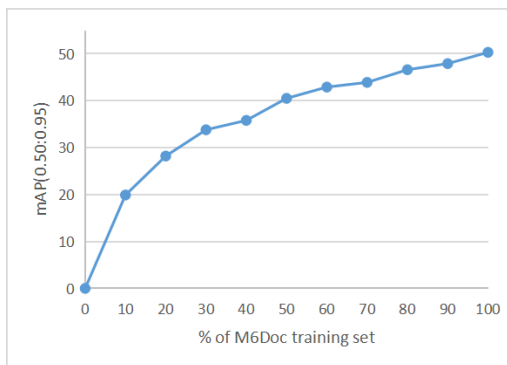

Figure 1. Mask R-CNN network with ResNet50 backbone trained on increasing fractions of the  $M^6Doc$  dataset.

## C. Dataset Comparison

We conducted cross-validation experiments on the DocBank, PubLayNet, DocLayNet, and  $M^6Doc$  datasets using the TransDLANetm model. A direct comparison is impossible due to the difference in label sets and annotation styles. Therefore, we focus on their common labels. We mapped the 74 labels in  $M^6Doc$  to labels consistent with DocBank, PubLayNet, and DocLayNet, respectively. The mapping rules are: (1) excluding categories that are annotated with different methods. We exclude the List-item category because the consecutive lists are segmentally labeled in DocLayNet, whereas consecutive lists are combined into one object in DocBank, PubLayNet, and  $M^6Doc$ . (2) removing the categories that are specific to subsets. (3) Mapping the fine-grained labels to the coarse-grained labels of DocBank, DocLayNet, and PubLayNet. The mapping is shown in Tables 1, 2 and 3.

Tables 4 and 5 show that the models trained on  $M^6Doc$ , DocLayNet, and PubLayNet datasets achieve high accuracy on their own test sets. It is worth noting that the model trained on  $M^6Doc$  maintained a high accuracy on the test sets of DocBank and PubLayNet, while the models trained on the DocBank and PubLayNet datasets performed inadequately on the test set of  $M^6Doc$ . This is due to the fact that DocBank and PubLayNet datasets have a single scenario and document type. It leads to poor scalability and robustness. In contrast,  $M^6Doc$  contains a wide range of scenarios and includes document categories and scenarios from the other two datasets. It exhibits good robustness.

As shown in Table 6, the model trained on DocLayNet, or  $M^6Doc$  performs very well on their own test set, but has much lower performances on the foreign datasets. This is caused by the inconsistent layout of DocLayNet and the  $M^6Doc$  datasets. Thus, it justifies the need for datasets with unseen layouts for the development document layout analysis.

## D. Impact of Class Labels

There are two versions of labeling the note subset, in which the first version (note-v1) contains 27 annotation categories and the second version (note-v2) contains 18 categories. Considering the fact that people take notes with large individual variability, the note subset presents higher ambiguity in annotations than other subsets. Therefore, we map the labels with ambiguity down to the paragraph category or delete them to obtain the second version. We use Mask R-CNN to train and evaluate the note subset with annotations from these two versions. As shown in Table 7, after we reduce the ambiguity label of the model, the mAP is improved by 2.7%.

Table 1. A mapping table that maps the fine-grained labels of  $M^6 Doc$  to the coarse-grained labels of DocBank.

| Before                      | After    | Before                       | After     |
|-----------------------------|----------|------------------------------|-----------|
| QR code                     | -        | institute                    | -         |
| advertisement               | figure   | jump line                    | -         |
| algorithm                   | -        | kicker                       | -         |
| answer                      | -        | lead                         | -         |
| author                      | -        | marginal note                | -         |
| barcode                     | -        | matching                     | -         |
| bill                        | -        | mugshot                      | figure    |
| blank                       | -        | option                       | -         |
| bracket                     | -        | ordered list                 | -         |
| breakout                    | -        | other question number        | -         |
| byline                      | -        | page number                  | -         |
| caption                     | caption  | paragraph                    | -         |
| catalogue                   | -        | part                         | section   |
| chapter title               | title    | play                         | -         |
| code                        | -        | poem                         | -         |
| correction                  | -        | reference                    | reference |
| credit                      | -        | sealing line                 | -         |
| dateline                    | -        | second-level question number | -         |
| drop cap                    | -        | second-level title           | section   |
| editor's note               | -        | section                      | -         |
| endnote                     | -        | section title                | section   |
| examinee information        | -        | sidebar                      | -         |
| fifth-level title           | section  | sub section title            | section   |
| figure                      | figure   | subhead                      | section   |
| first-level question number | -        | subsub section title         | section   |
| first-level title           | section  | supplementary note           | -         |
| flag                        | -        | table                        | table     |
| folio                       | -        | table caption                | caption   |
| footer                      | -        | table note                   | -         |
| footnote                    | -        | teasers                      | -         |
| formula                     | equation | third-level question number  | -         |
| fourth-level section title  | section  | third-level title            | section   |
| fourth-level title          | section  | title                        | title     |
| header                      | -        | translator                   | -         |
| headline                    | section  | underscore                   | -         |
| index                       | -        | unordered list               | -         |
| inside                      | -        | weather forecast             | -         |

Table 2. A mapping table that maps the fine-grained labels of  $M^6 Doc$  to the coarse-grained labels of DocLayNet.

| Before                      | After          | Before                       | After       |
|-----------------------------|----------------|------------------------------|-------------|
| QR code                     | -              | institute                    | Text        |
| advertisement               | Picture        | jump line                    | Text        |
| algorithm                   | -              | kicker                       | Text        |
| answer                      | -              | lead                         | Text        |
| author                      | Text           | marginal note                | Page-header |
| barcode                     | -              | matching                     | -           |
| bill                        | -              | mugshot                      | Picture     |
| blank                       | -              | option                       | -           |
| bracket                     | -              | ordered list                 | -           |
| breakout                    | Text           | other question number        | -           |
| byline                      | Text           | page number                  | Text        |
| caption                     | Caption        | paragraph                    | Text        |
| catalogue                   | -              | part                         | Title       |
| chapter title               | Title          | play                         | -           |
| code                        | -              | poem                         | -           |
| correction                  | -              | reference                    | -           |
| credit                      | Text           | sealing line                 | -           |
| dateline                    | Text           | second-level question number | -           |
| drop cap                    | -              | second-level title           | Title       |
| editor's note               | Text           | section                      | Text        |
| endnote                     | Text           | section title                | Title       |
| examinee information        | -              | sidebar                      | -           |
| fifth-level title           | Title          | sub section title            | Title       |
| figure                      | Picture        | subhead                      | Title       |
| first-level question number | -              | subsub section title         | Title       |
| first-level title           | Title          | supplementary note           | -           |
| flag                        | -              | table                        | Table       |
| folio                       | Section-header | table caption                | Caption     |
| footer                      | Page-footer    | table note                   | -           |
| footnote                    | Footnote       | teasers                      | -           |
| formula                     | Formula        | third-level question number  | -           |
| fourth-level section title  | Title          | third-level title            | Title       |
| fourth-level title          | Title          | title                        | Title       |
| header                      | Section-header | translator                   | Text        |
| headline                    | Title          | underscore                   | -           |
| index                       | Page-header    | unordered list               | -           |
| inside                      | -              | weather forecast             | -           |

Table 3. A mapping table that maps the fine-grained labels of  $M^6 Doc$  to the coarse-grained labels of PubLayNet.

| Before                      | After  | Before                       | After  |
|-----------------------------|--------|------------------------------|--------|
| QR code                     | -      | institute                    | text   |
| advertisement               | figure | jump line                    | text   |
| algorithm                   | -      | kicker                       | text   |
| answer                      | text   | lead                         | text   |
| author                      | text   | marginal note                | text   |
| barcode                     | -      | matching                     | -      |
| bill                        | -      | mugshot                      | figure |
| blank                       | -      | option                       | -      |
| bracket                     | -      | ordered list                 | list   |
| breakout                    | text   | other question number        | -      |
| byline                      | text   | page number                  | text   |
| caption                     | text   | paragraph                    | text   |
| catalogue                   | -      | part                         | title  |
| chapter title               | title  | play                         | -      |
| code                        | -      | poem                         | -      |
| correction                  | -      | reference                    | -      |
| credit                      | text   | sealing line                 | -      |
| dateline                    | text   | second-level question number | -      |
| drop cap                    | -      | second-level title           | Title  |
| editor's note               | text   | section                      | text   |
| endnote                     | text   | section title                | title  |
| examinee information        | -      | sidebar                      | -      |
| fifth-level title           | title  | sub section title            | title  |
| figure                      | figure | subhead                      | title  |
| first-level question number | -      | subsub section title         | title  |
| first-level title           | title  | supplementary note           | -      |
| flag                        | -      | table                        | table  |
| folio                       | text   | table caption                | text   |
| footer                      | text   | table note                   | text   |
| footnote                    | text   | teasers                      | -      |
| formula                     | text   | third-level question number  | -      |
| fourth-level section title  | title  | third-level title            | title  |
| fourth-level title          | title  | title                        | title  |
| header                      | text   | translator                   | text   |
| headline                    | text   | underscore                   | -      |
| index                       | text   | unordered list               | list   |
| inside                      | -      | weather forecast             | -      |

Table 4. The prediction performance (mAP@0.5-0.95) of the TransDLANet network was evaluated on the common label classes of the DocBank and  $M^6 Doc$  datasets.

| Training on | labels | Testing on |         |
|-------------|--------|------------|---------|
|             |        | $M^6 Doc$  | DocBank |
| $M^6 Doc$   | figure | 69.77      | 42.67   |
|             | table  | 72.57      | 43.29   |
|             | title  | 58.16      | 36.47   |
|             | mAP    | 66.83      | 40.81   |
| DocBank     | figure | 20.70      | 58.47   |
|             | table  | 18.01      | 62.98   |
|             | title  | 7.26       | 83.70   |
|             | mAP    | 15.32      | 68.38   |

## E. Ablation study for TransDLANet

**Mask Embedding.** Table 8 shows the results of mask embedding in different dimensions. Because the profile of document elements is relatively simple, a mask dimension setting of 40 can obtain the best performance.

**Transformer encoder.** The biggest limitation of the query-based approach is its low recall. In order to improve the recall, we differ from the ISTR approach in that we first use a standard Transformer encoder, which performs self-attentive feature learning on the implicit embedding vectors of the query vector and uses an adaptive element matching

Table 5. The prediction performance (mAP@0.5-0.95) of the TransDLANet network was evaluated on the common label classes of the PubLayNet and  $M^6Doc$  datasets.

| Training on | labels | Testing on |           |
|-------------|--------|------------|-----------|
|             |        | $M^6Doc$   | PubLayNet |
| $M^6Doc$    | Text   | 72.56      | 60.21     |
|             | Title  | 63.50      | 53.26     |
|             | List   | 38.95      | 59.15     |
|             | Table  | 74.83      | 79.66     |
|             | Figure | 74.23      | 62.45     |
|             | mAP    | 64.81      | 62.94     |
| PubLayNet   | Text   | 20.46      | 94.26     |
|             | Title  | 12.92      | 89.20     |
|             | List   | 7.41       | 95.18     |
|             | Table  | 12.98      | 97.21     |
|             | Figure | 8.39       | 96.62     |
|             | mAP    | 12.43      | 94.49     |

Table 6. The prediction performance (mAP@0.5-0.95) of the TransDLANet network was evaluated on the common label classes of the DocLayNet and  $M^6Doc$  datasets.

| Training on    | labels         | Testing on |           |      |
|----------------|----------------|------------|-----------|------|
|                |                | $M^6Doc$   | DocLayNet |      |
| $M^6Doc$       | Caption        | 61.9       | 12.7      |      |
|                | Footnote       | 70.2       | 5.8       |      |
|                | Formula        | 47.7       | 9.0       |      |
|                | Page-footer    | 71.0       | 8.0       |      |
|                | Page-header    | 71.1       | 3.2       |      |
|                | Picture        | 75.4       | 30.0      |      |
|                | Section-header | 73.2       | 5.0       |      |
|                | Table          | 78.0       | 34.2      |      |
|                | Text           | 80.0       | 26.2      |      |
|                | Title          | 71.1       | 0.4       |      |
|                | mAP            | 69.96      | 13.45     |      |
|                | DocLayNet      | Caption    | 13.2      | 68.2 |
|                |                | Footnote   | 7.0       | 74.7 |
|                |                | Formula    | 2.5       | 61.6 |
| Page-footer    |                | 8.2        | 54.8      |      |
| Page-header    |                | 0.8        | 68.2      |      |
| Picture        |                | 40.1       | 68.5      |      |
| Section-header |                | 1.6        | 69.8      |      |
| Table          |                | 39.2       | 82.4      |      |
| Text           |                | 45.8       | 83.8      |      |
| Title          |                | 3.6        | 81.7      |      |
| mAP            | 16.20          | 71.37      |           |      |

mechanism to enhance the association between document instances encoded by the query vector. As shown in Table 9, we conducted experiments to test the effectiveness of the Transformer encoder. Compared with the methods without a Transformer encoder, there is a performance gap of around 20%.

**Dynamic decoder.** After we get the information between queries in the Transformer encoder, we went through the Dynamic decoder to fuse the RoI and image features. We also conducted experiments to test the effectiveness of the Dynamic encoder. As shown in Table 9, compared with using the fusion feature, there is an improvement of around 10%.

**Shared MLP.** We use three shared-parameter MLP

Table 7. Effects of coarse and fine granularity of labels on the note dataset.

| Category                     | note_v1 | note_v2   |
|------------------------------|---------|-----------|
| answer                       | 8.1     | 5.8       |
| bracket                      | 0.0     | -         |
| caption                      | 0.0     | 0.1       |
| catalogue                    | 19.2    | 14.3      |
| chapter title                | 18.0    | 18.3      |
| fifth-level title            | 2.4     | paragraph |
| figure                       | 0.4     | 0.7       |
| first-level question number  | 0.0     | -         |
| first-level title            | 13.6    | paragraph |
| footer                       | 62.5    | 58.5      |
| formula                      | 1.5     | 2.6       |
| fourth-level title           | 19.5    | paragraph |
| option                       | 0.0     | 0         |
| ordered list                 | 3.2     | 2.2       |
| page number                  | 55.3    | 55.3      |
| paragraph                    | 28.1    | 41.3      |
| part                         | 0.0     | 0         |
| second-level question number | 0.0     | -         |
| second-level title           | 0.0     | paragraph |
| section                      | 12.4    | 17        |
| section title                | 9.3     | 7         |
| sub section title            | 5.1     | 5.9       |
| supplementary note           | 0.0     | 0         |
| table                        | 22.7    | 17.4      |
| third-level title            | 25.8    | paragraph |
| underscore                   | 0.0     | -         |
| unordered list               | 28.5    | 25.9      |
| mAP                          | 12.4    | 15.1      |

Table 8. Ablation study for mask embedding dimension.

| Ablation study           | Object Detection |             |             |             | Instance Segmentation |             |             |
|--------------------------|------------------|-------------|-------------|-------------|-----------------------|-------------|-------------|
|                          | mAP              | AP50        | AP75        | Recall      | mAP                   | AP50        | AP75        |
| embedding dimension = 20 | 63.2             | 81.0        | 72.0        | 74.0        | 62.7                  | 80.9        | 71.3        |
| embedding dimension = 40 | <b>64.5</b>      | <b>82.7</b> | <b>72.7</b> | <b>74.9</b> | <b>63.8</b>           | <b>82.6</b> | <b>71.9</b> |
| embedding dimension = 60 | 63.4             | 81.1        | 74.6        | 72.3        | 62.8                  | 81.0        | 71.3        |

Table 9. Ablation study for different components.

| Ablation study                | Object Detection |             |             |             | Instance Segmentation |             |             |
|-------------------------------|------------------|-------------|-------------|-------------|-----------------------|-------------|-------------|
|                               | mAP              | AP50        | AP75        | Recall      | mAP                   | AP50        | AP75        |
| Ours, w/o Transformer encoder | 47.8             | 62.6        | 54.4        | 65.4        | 47.3                  | 62.6        | 53.9        |
| Ours, w/o Dynamic decoder     | 52.8             | 70.5        | 48.0        | 73.9        | 52.3                  | 70.4        | 47.6        |
| Ours, w/o Shared_MLP          | 64.2             | 82.3        | 72.1        | 74.1        | 63.6                  | 82.2        | 71.2        |
| Ours                          | <b>64.5</b>      | <b>82.7</b> | <b>72.7</b> | <b>74.9</b> | <b>63.8</b>           | <b>82.6</b> | <b>71.9</b> |

branches to decode the fused interaction features for multi-task learning. Compared with the methods without shared-parameter MLP, there is an improvement of around 0.3-0.8%.

## F. Performance of baseline and TransDLANet on the nine subsets of $M^6Doc$

We trained TransDLANet for 500 epochs, and the learning rate was reduced to  $2 \times 10^{-6}$  and  $2 \times 10^{-7}$  at 50% and 75% of the training epochs, respectively. We use object detection-based, instance segmentation-based, and query-based approaches to experiment with nine subsets of  $M^6Doc$ .

As shown in Table 10, we can see that TransDLANet obtains the best performance in almost all subsets.

Table 10. Performance comparisons on nine subsets of  $M^6 Doc$ .

| Method             | Backbone   | scientific article |             |             |                       |             |             | magazine.ch      |             |             |                       |             |             | magazine.en      |             |             |                       |             |             |
|--------------------|------------|--------------------|-------------|-------------|-----------------------|-------------|-------------|------------------|-------------|-------------|-----------------------|-------------|-------------|------------------|-------------|-------------|-----------------------|-------------|-------------|
|                    |            | Object Detection   |             |             | Instance Segmentation |             |             | Object Detection |             |             | Instance Segmentation |             |             | Object Detection |             |             | Instance Segmentation |             |             |
|                    |            | mAP                | AP50        | AP75        | mAP                   | AP50        | AP75        | mAP              | AP50        | AP75        | mAP                   | AP50        | AP75        | mAP              | AP50        | AP75        | mAP                   | AP50        | AP75        |
| FCOS               | ResNet-101 | 26.3               | 45.1        | 27.2        | 25.9                  | 44.9        | 26.5        | 40.1             | 57.3        | 45.8        | 39.7                  | 57.3        | 45.1        | 38.4             | 60.5        | 42.5        | 37.8                  | 60.5        | 41.8        |
| FoveaBox           | ResNet-101 | 29.8               | 52.7        | 30.7        | 29.4                  | 52.4        | 30.8        | 43.4             | 59.7        | 50.4        | 43.1                  | 59.7        | 50.0        | 41.5             | 66.7        | 44.0        | 41.1                  | 66.9        | 42.8        |
| Faster R-CNN       | ResNet-101 | 41.5               | 62.0        | 46.8        | 40.9                  | 61.7        | 45.4        | 49.0             | 63.5        | 58.3        | 48.4                  | 63.5        | 57.1        | 47.9             | 66.7        | 55.9        | 47.1                  | 66.7        | 54.5        |
| Cascade R-CNN      | ResNet-101 | 39.8               | 55.5        | 45.7        | 39.4                  | 55.8        | 44.8        | 51.3             | 63.5        | 60.0        | 50.7                  | 63.4        | 59.5        | 46.3             | 61.3        | 54.0        | 45.9                  | 61.2        | 53.3        |
| Mask R-CNN         | ResNet-101 | 34.9               | 53.5        | 37.6        | 35.0                  | 53.3        | 38.3        | 47.1             | 61.1        | 55.4        | 46.4                  | 61.0        | 55.2        | 43.9             | 60.8        | 50.2        | 43.2                  | 60.7        | 50.3        |
| Cascade Mask R-CNN | ResNet-101 | 41.8               | 57.3        | 47.4        | 41.4                  | 57.1        | 46.6        | 46.4             | 58.6        | 54.0        | 46.0                  | 58.6        | 53.9        | 59.4             | 74.7        | 69.0        | 58.5                  | 74.9        | 68.3        |
| HTC                | ResNet-101 | 49.2               | 66.0        | 55.2        | 48.8                  | 65.9        | 54.3        | <b>51.9</b>      | <b>64.7</b> | <b>60.3</b> | <b>50.7</b>           | <b>64.8</b> | <b>59.4</b> | 60.4             | 77.3        | 71.7        | 59.6                  | 77.3        | 70.9        |
| SCNet              | ResNet-101 | 36.0               | 51.4        | 40.9        | 35.5                  | 51.3        | 39.4        | 49.0             | 62.2        | 57.2        | 48.3                  | 62.2        | 56.9        | 49.1             | 66.3        | 57.3        | 48.2                  | 66.2        | 56.2        |
| SOLO               | ResNet-101 | 32.1               | 51.1        | 33.9        | 32.8                  | 53.5        | 33.9        | 35.6             | 53.0        | 39.9        | 37.1                  | 54.6        | 42.1        | 34.4             | 59.9        | 32.8        | 36.1                  | 59.6        | 34.5        |
| SOLOv2             | ResNet-101 | 33.5               | 54.0        | 35.9        | 33.0                  | 54.5        | 36.0        | 33.8             | 51.8        | 36.5        | 35.8                  | 53.7        | 39.5        | 45.3             | 71.1        | 49.4        | 47.9                  | 72.7        | 54.0        |
| Deformable DETR    | ResNet-101 | 32.3               | 43.7        | 35.8        | 32.0                  | 43.7        | 35.3        | 40.2             | 55.1        | 45.8        | 39.9                  | 55.0        | 45.0        | 51.1             | 72.0        | 58.6        | 50.8                  | 71.9        | 57.7        |
| QueryInst          | ResNet-101 | 32.0               | 46.2        | 36.3        | 31.6                  | 45.8        | 35.5        | 37.4             | 49.7        | 43.2        | 37.6                  | 50.4        | 43.5        | 44.8             | 60.6        | 53.8        | 44.5                  | 61.1        | 53.2        |
| ISTR               | ResNet-101 | <b>61.8</b>        | <b>80.3</b> | <b>69.7</b> | <b>61.1</b>           | <b>80.2</b> | <b>70.2</b> | 50.5             | 63.4        | 58.4        | 50.5                  | 63.5        | 58.4        | 66.3             | 83.0        | 75.6        | 65.7                  | 83.0        | 75.0        |
| Ours               | ResNet-101 | 59.7               | 78.7        | 68.2        | 59.1                  | 78.5        | 67.0        | 50.2             | 63.0        | 57.7        | 49.8                  | 62.9        | 57.3        | <b>68.2</b>      | <b>85.0</b> | <b>77.2</b> | <b>68.2</b>           | <b>85.0</b> | <b>77.2</b> |
| Method             | Backbone   | note               |             |             |                       |             |             | newspaper.ch     |             |             |                       |             |             | newspaper.en     |             |             |                       |             |             |
|                    |            | Object Detection   |             |             | Instance Segmentation |             |             | Object Detection |             |             | Instance Segmentation |             |             | Object Detection |             |             | Instance Segmentation |             |             |
|                    |            | mAP                | AP50        | AP75        | mAP                   | AP50        | AP75        | mAP              | AP50        | AP75        | mAP                   | AP50        | AP75        | mAP              | AP50        | AP75        | mAP                   | AP50        | AP75        |
| GFL                | ResNet-101 | 11.1               | 19.1        | 11.7        | 11.0                  | 19.1        | 12.1        | 22.1             | 35.9        | 24.7        | 21.8                  | 35.9        | 23.9        | 20.5             | 30.1        | 22.8        | 20.3                  | 30.0        | 22.7        |
| FCOS               | ResNet-101 | 19.1               | 36.7        | 18.7        | 18.9                  | 36.5        | 17.8        | 22.7             | 41.7        | 21.1        | 22.5                  | 41.6        | 21.7        | 17.8             | 32.6        | 17.4        | 17.5                  | 32.4        | 16.8        |
| FoveaBox           | ResNet-101 | 19.8               | 36.2        | 21.5        | 19.5                  | 36.3        | 20.3        | 21.5             | 37.6        | 22.3        | 21.3                  | 37.5        | 22.1        | 35.5             | 56.4        | 39.6        | 34.9                  | 56.3        | 37.7        |
| Faster R-CNN       | ResNet-101 | 29.3               | 46.1        | 33.9        | 28.9                  | 46.1        | 32.9        | 32.2             | 50.6        | 33.9        | 32.3                  | 50.8        | 33.9        | 34.3             | 50.7        | 39.4        | 34.0                  | 50.7        | 39.3        |
| Cascade R-CNN      | ResNet-101 | 22.5               | 34.9        | 27.3        | 22.3                  | 34.9        | 27.3        | 27.7             | 42.6        | 29.8        | 27.7                  | 42.7        | 30.0        | 26.3             | 36.5        | 29.6        | 26.0                  | 36.3        | 29.3        |
| Mask R-CNN         | ResNet-101 | 15.1               | 27.6        | 15.3        | 15.2                  | 27.8        | 14.6        | 21.2             | 36.9        | 21.2        | 20.5                  | 36.2        | 19.9        | 19.9             | 31.1        | 21.9        | 19.7                  | 31.0        | 21.8        |
| Cascade Mask R-CNN | ResNet-101 | 24.3               | 36.7        | 28.9        | 24.0                  | 36.7        | 28.0        | 43.2             | 60.8        | 47.1        | 42.9                  | 60.7        | 47.1        | 23.4             | 32.8        | 26.9        | 23.1                  | 32.7        | 26.6        |
| HTC                | ResNet-101 | 36.7               | 53.4        | 43.4        | 36.7                  | 53.7        | 42.3        | 36.3             | 53.3        | 38.8        | 5.6                   | 53.1        | 37.9        | 43.7             | 57.3        | 48.4        | 43.4                  | 57.1        | 48.1        |
| SCNet              | ResNet-101 | 27.9               | 41.9        | 33.8        | 27.9                  | 41.6        | 33.0        | 20.0             | 33.0        | 20.7        | 19.9                  | 32.8        | 20.7        | 19.3             | 27.2        | 22.3        | 19.2                  | 27.2        | 21.9        |
| SOLO               | ResNet-101 | 22.2               | 38.0        | 22.8        | 22.1                  | 39.3        | 23.8        | 30.5             | 48.0        | 33.1        | 30.9                  | 48.5        | 34.2        | 14.5             | 32.7        | 11.6        | 14.9                  | 31.8        | 14.1        |
| SOLOv2             | ResNet-101 | 26.9               | 44.1        | 28.5        | 29.0                  | 44.7        | 32.7        | 24.5             | 40.2        | 26.1        | 26.2                  | 42.5        | 28.0        | 30.7             | 50.1        | 31.5        | 32.7                  | 51.8        | 34.9        |
| Deformable DETR    | ResNet-101 | 24.2               | 33.5        | 28.5        | 23.9                  | 33.5        | 28.3        | 29.7             | 43.8        | 32.4        | 29.6                  | 43.7        | 32.3        | 34.2             | 49.7        | 38.1        | 34.1                  | 49.3        | 38.4        |
| QueryInst          | ResNet-101 | 23.3               | 35.5        | 27.1        | 23.3                  | 35.5        | 26.5        | 28.9             | 43.6        | 31.5        | 29.3                  | 44.7        | 31.8        | 36.5             | 48.2        | 41.4        | 38.4                  | 51.2        | 43.4        |
| ISTR               | ResNet-101 | <b>48.6</b>        | <b>63.9</b> | <b>57.3</b> | <b>48.5</b>           | <b>63.9</b> | <b>56.7</b> | 52.7             | 68.3        | 58.9        | 52.3                  | 68.4        | 58.0        | 61.0             | 73.9        | 68.8        | 60.7                  | 73.9        | 68.1        |
| Ours               | ResNet-101 | 44.1               | 60.5        | 50.7        | 43.6                  | 60.3        | 49.9        | <b>59.4</b>      | <b>78.1</b> | <b>65.9</b> | <b>59.0</b>           | <b>78.1</b> | <b>65.3</b> | <b>64.0</b>      | <b>78.4</b> | <b>73.3</b> | <b>63.6</b>           | <b>78.2</b> | <b>72.6</b> |
| Method             | Backbone   | test paper         |             |             |                       |             |             | textbook         |             |             |                       |             |             | book             |             |             |                       |             |             |
|                    |            | Object Detection   |             |             | Instance Segmentation |             |             | Object Detection |             |             | Instance Segmentation |             |             | Object Detection |             |             | Instance Segmentation |             |             |
|                    |            | mAP                | AP50        | AP75        | mAP                   | AP50        | AP75        | mAP              | AP50        | AP75        | mAP                   | AP50        | AP75        | mAP              | AP50        | AP75        | mAP                   | AP50        | AP75        |
| GFL                | ResNet-101 | 44.4               | 65.4        | 52.1        | 43.4                  | 65.1        | 49.6        | 38.7             | 57.1        | 44.9        | 37.1                  | 57.0        | 42.5        | 8.0              | 15.8        | 6.8         | 6.8                   | 15.5        | 4.7         |
| FCOS               | ResNet-101 | 37.9               | 59.7        | 43.0        | 36.6                  | 59.6        | 39.4        | 33.2             | 52.7        | 38.0        | 31.6                  | 52.5        | 34.8        | 10.3             | 23.5        | 6.7         | 7.9                   | 20.7        | 4.2         |
| FoveaBox           | ResNet-101 | 42.8               | 66.8        | 48.9        | 41.4                  | 66.8        | 46.3        | 34.5             | 54.2        | 39.7        | 33.2                  | 54.1        | 37.3        | 21.6             | 37.6        | 22.3        | 21.3                  | 37.5        | 22.1        |
| Faster R-CNN       | ResNet-101 | 52.0               | 74.1        | 60.6        | 51.1                  | 74.2        | 59.8        | 43.6             | 62.7        | 52.7        | 42.4                  | 62.6        | 50.2        | 14.5             | 27.2        | 13.5        | 12.0                  | 26.3        | 9.2         |
| Cascade R-CNN      | ResNet-101 | 54.3               | 73.4        | 63.0        | 53.8                  | 73.5        | 62.7        | 47.1             | 64.7        | 55.4        | 45.8                  | 64.6        | 54.2        | 9.2              | 16.3        | 8.9         | 7.7                   | 16.2        | 6.0         |
| Mask R-CNN         | ResNet-101 | 49.1               | 70.2        | 56.9        | 48.1                  | 70.0        | 55.7        | 40.3             | 58.1        | 48.3        | 39.8                  | 58.0        | 47.5        | 7.1              | 14.9        | 5.7         | 7.6                   | 15.0        | 5.9         |
| Cascade Mask R-CNN | ResNet-101 | 52.6               | 71.7        | 61.1        | 52.3                  | 71.8        | 60.4        | 45.7             | 62.8        | 54.1        | 44.4                  | 62.7        | 52.3        | 10.8             | 18.8        | 11.5        | 8.8                   | 18.4        | 7.1         |
| HTC                | ResNet-101 | 57.9               | 77.7        | 66.9        | 57.2                  | 77.6        | 65.9        | 51.2             | 69.6        | 60.3        | 50.5                  | 69.6        | 59.1        | 19.6             | 29.6        | 24.1        | 18.8                  | 29.5        | 22.4        |
| SCNet              | ResNet-101 | 54.8               | 75.5        | 64.2        | 53.9                  | 75.3        | 62.6        | 44.6             | 62.7        | 51.8        | 43.6                  | 62.5        | 50.3        | 6.6              | 12.2        | 6.3         | 6.7                   | 12.2        | 6.3         |
| SOLO               | ResNet-101 | 36.2               | 59.1        | 38.5        | 36.2                  | 61.1        | 37.9        | 31.8             | 49.7        | 35.1        | 31.1                  | 50.3        | 34.8        | 5.8              | 13.9        | 4.0         | 3.2                   | 10.0        | 1.1         |
| SOLOv2             | ResNet-101 | 33.0               | 55.7        | 33.3        | 34.5                  | 57.4        | 36.5        | 33.7             | 54.6        | 36.6        | 35.0                  | 55.3        | 38.2        | 17.3             | 29.8        | 17.2        | 15.6                  | 29.2        | 16.4        |
| Deformable DETR    | ResNet-101 | 53.7               | 75.2        | 60.8        | 53.5                  | 75.3        | 60.2        | 46.6             | 64.6        | 53.8        | 45.0                  | 64.4        | 51.5        | 14.0             | 21.7        | 15.5        | 10.1                  | 20.0        | 9.0         |
| QueryInst          | ResNet-101 | 44.0               | 60.9        | 50.4        | 43.4                  | 61.2        | 49.9        | 35.7             | 50.0        | 41.3        | 35.5                  | 50.1        | 41.1        | 10.7             | 17.1        | 11.8        | 10.5                  | 17.2        | 11.6        |
| ISTR               | ResNet-101 | 60.4               | 80.9        | <b>68.5</b> | 60.1                  | 80.9        | <b>67.9</b> | 50.1             | 68.2        | 58.7        | 49.5                  | 68.1        | 57.3        | <b>29.0</b>      | 39.9        | <b>35.4</b> | <b>28.4</b>           | 39.8        | <b>34.4</b> |
| Ours               | ResNet-101 | <b>60.7</b>        | <b>81.9</b> | 68.0        | <b>60.3</b>           | <b>82.2</b> | 66.9        | <b>51.7</b>      | <b>70.1</b> | <b>60.3</b> | <b>51.2</b>           | <b>70.1</b> | <b>59.5</b> | 28.3             | <b>41.0</b> | 33.0        | 27.9                  | <b>40.7</b> | 33.0        |

In the following, we will specifically analyze the performance of TransDLANet on different datasets. Tables 11, 12, 13, 14, 15, 16, 17, 18, and 19 show the APs of different categories in each of the nine subsets. Figure 2 shows the visualization results of TransDLANet trained on and inferred on nine subsets.

As shown in Table 11, we can see that TransDLANet obtains low precision in the formula, ordered list, and table note categories in the scientific article subset. The visualization results show that the formula category’s low precision is attributed to many small formulas that are not detected, and the low precision of the ordered list is due to its easy identification as a paragraph category. The low precision of the page number category is due to the small target of this

category, and the insufficient resolution during training and inference. We can consider increasing the resolution of the images during training and inference to improve this phenomenon.

As shown in Table 12, the advertisement, byline, ordered list, poem, and table categories are almost unrecognizable. This is due to the small training set of these categories in the magazine.ch subset, which contains only 2, 12, 2, 15, and 5 training samples, respectively. Therefore, the model cannot learn the characteristics of these categories well. This phenomenon is alleviated in the total dataset of  $M^6 Doc$  mixed with nine subsets. From the visualization results, we can see that the unordered list is confused during inference. This is because the training samples of the unordered list



are small, and most of them are annotated with large areas, which leads to overfitting when the model learns this category. We can also see that the poem category may be recognized as the unordered list category because they have a uniform hanging indent format. Additionally, since the layout logic of “China National Geographic” is very different from other Chinese magazines, especially in the headline and subhead category, incorrect detection of headlines appears more frequently in this magazine.

As shown in Table 13, the TransDLANet model can process the magazine\_en dataset well, and the accuracy of each category is relatively balanced, except for the footnote category. We can see from the visualization results that the main reason for the low accuracy of the footnote category is that the large footnote category cannot be identified, and we can also see that the current model is not able to handle rotated images. We can consider more data enhancements to adapt to this scenario.

As shown in Table 14, since the note subset contains handwritten notes, it does not have apparent font size and color differences like published printed documents, and there is also great individual variability in personal notes. Hence, almost all models fail to obtain better results. In particular, the “figure” category’s accuracy is much lower than other subsets. This is because the main difference between handwritten and printed documents is that figures in the former are drawn by hand, which led to no significantly different color features between figure, paragraph, and table instances. The visualization results show that the formulas of both mathematics and chemistry are almost unrecognizable, probably because the format of handwritten formulas is not as strict as that of published printed documents.

As shown in Tables 15 and 16, the model trained on the newspaper\_ch subset cannot identify the byline and index categories, while the newspaper\_en subset cannot identify the ordered list and unordered list categories. This is mainly because the annotated samples of these categories are too limited. From the visualization results, we can see that newspapers of this type have very dense text, so there are more missed detections of paragraph instances than in other subsets. This can be improved by increasing the number of pre-defined queries or the number of epochs for training. Moreover, we can think about how to solve the problem of low recall with query-based methods.

As shown in Table 17, the TransDLANet model can accurately identify and locate different categories of layout elements in educational documents. This phenomenon can be attributed to the relatively low ambiguity and confusion among categories in the layout analysis of educational documents. However, TransDLANet still faces some limitations and challenges. For example, the low precision of categories with fewer annotation samples, such as seal lines, unordered lists, candidate information areas, footnotes, and

other question numbers, with training set sizes of 3, 5, 8, 30, and 42, respectively. This is because the sample distribution of different categories in the dataset is imbalanced, so some categories have very few samples, which results in poor performance of the model in these categories. Therefore, future research should focus on those categories with fewer samples to improve the performance of the model.

As shown in Table 18, the second-level title can almost not be recognized, and the third-level question number and fourth-level title are incorrectly identified as ordered lists or paragraphs because they are similar to ordered lists and the training sample size is small. This suggests that the performance of the model is still inadequate for labels with a small number of training samples and that more samples and better data enhancement methods are needed to improve its recognition performance.

Because the book subset comes from 50 books and only six graphs are trained for each book, processing this subset well is very difficult. As shown in Tables 10, and 19, all the models cannot obtain good results, and almost all the categories cannot obtain high AP. In addition, the reason for the AP of the “drop cap” category being nan is that there is only one drop cap annotation in the book subset, which cannot be equally assigned to training, evaluation, and test sets. However, to maintain consistent annotation with other datasets, we kept this category. The visualization results are shown in Figure 2.

Table 11. The performance of TransDLANet on the scientific article test set.

| Category                   | AP     | Category             | AP     | Category      | AP     |
|----------------------------|--------|----------------------|--------|---------------|--------|
| algorithm                  | 84.379 | author               | 42.522 | caption       | 75.633 |
| code                       | 50.000 | drop cap             | 60.000 | figure        | 79.765 |
| footer                     | 50.217 | footnote             | 66.101 | formula       | 26.691 |
| fourth-level section title | 48.513 | header               | 66.968 | institute     | 57.636 |
| marginal note              | 78.634 | ordered list         | 21.704 | page number   | 38.226 |
| paragraph                  | 87.656 | reference            | 94.281 | section title | 58.769 |
| sub section title          | 62.701 | subsub section title | 31.692 | table         | 90.409 |
| table caption              | 64.005 | table note           | 22.038 | title         | 68.761 |
| unordered list             | 65.143 |                      |        |               |        |

Table 12. The performance of TransDLANet on the magazine\_ch test set.

| Category   | AP     | Category           | AP     | Category    | AP     |
|------------|--------|--------------------|--------|-------------|--------|
| QR code    | 76.832 | advertisement      | 0.130  | author      | 54.551 |
| byline     | 0.652  | caption            | 50.815 | credit      | 73.215 |
| figure     | 77.505 | footer             | 73.403 | header      | 79.318 |
| headline   | 70.126 | ordered list       | 0.009  | page number | 64.164 |
| paragraph  | 91.514 | poem               | 0.000  | section     | 74.005 |
| subhead    | 59.667 | supplementary note | 78.409 | table       | 0.125  |
| translator | 53.897 | unordered list     | 25.326 |             |        |

## G. Discussion of Failure Cases of DocLayNet and PubLayNet datasets

Figures 3, 4 show some of the failures of the TransDLANet model on the DocLayNet and PubLayNet datasets.

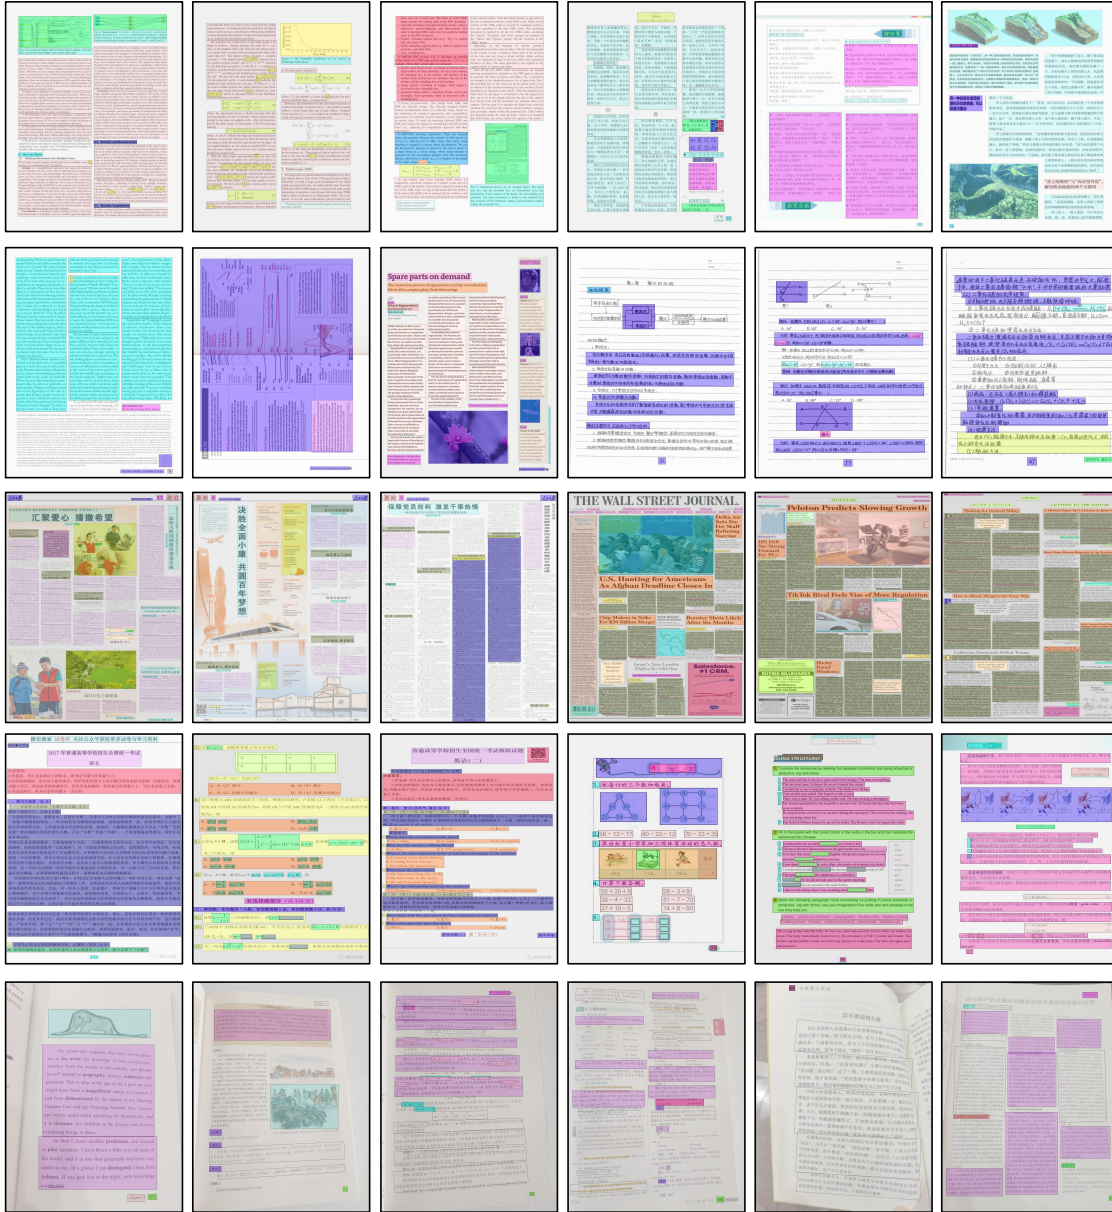

Figure 2. The Visualization results of TransDLANet trained on and inferred on nine subsets. Zoom in for better view.

Table 13. The performance of TransDLANet on the magazine.en test set.

| Category     | AP     | Category           | AP     | Category       | AP     |
|--------------|--------|--------------------|--------|----------------|--------|
| QR code      | 80.000 | advertisement      | 72.343 | author         | 48.984 |
| breakout     | 83.364 | byline             | 45.858 | caption        | 68.649 |
| credit       | 60.942 | dateline           | 61.780 | drop cap       | 66.936 |
| figure       | 79.911 | footer             | 72.285 | footnote       | 35.439 |
| header       | 79.068 | headline           | 72.863 | lead           | 82.744 |
| ordered list | 72.376 | page number        | 59.108 | paragraph      | 92.683 |
| poem         | 50.495 | section            | 69.735 | sidebar        | 65.461 |
| subhead      | 62.719 | supplementary note | 60.192 | unordered list | 91.683 |

Table 14. The performance of TransDLANet on the note test set.

| Category           | AP     | Category      | AP     | Category          | AP     |
|--------------------|--------|---------------|--------|-------------------|--------|
| answer             | 44.210 | caption       | 21.512 | catalogue         | 87.947 |
| chapter title      | 58.599 | figure        | 23.948 | footer            | 70.653 |
| formula            | 13.688 | option        | 43.396 | ordered list      | 25.549 |
| page number        | 55.228 | paragraph     | 55.782 | part              | 21.201 |
| section            | 14.880 | section title | 59.468 | sub section title | 48.215 |
| supplementary note | 0.332  | table         | 91.555 | unordered list    | 58.368 |

As shown in Figures 3 and 4, the TransDLANet model trained on both the DocLayNet and PubLayNet datasets suffers from a missing detection problem during inference.

Table 15. The performance of TransDLANet on the newspaper\_ch test set.

| Category           | AP     | Category      | AP     | Category       | AP     |
|--------------------|--------|---------------|--------|----------------|--------|
| QR code            | 58.442 | advertisement | 63.137 | author         | 46.547 |
| byline             | 0.000  | caption       | 43.161 | credit         | 34.098 |
| dateline           | 59.176 | editor's note | 50.666 | figure         | 69.642 |
| flag               | 97.481 | folio         | 69.364 | footer         | 63.756 |
| headline           | 73.578 | index         | 0.129  | jump line      | 54.670 |
| kicker             | 61.401 | lead          | 77.944 | mugshot        | 74.719 |
| ordered list       | 26.165 | page number   | 50.256 | paragraph      | 85.700 |
| section            | 79.598 | sidebar       | 94.422 | subhead        | 62.211 |
| supplementary note | 66.535 | teasers       | 86.906 | unordered list | 53.598 |

Table 16. The performance of TransDLANet on the newspaper\_en test set.

| Category         | AP      | Category           | AP     | Category       | AP     |
|------------------|---------|--------------------|--------|----------------|--------|
| advertisement    | 73.364  | author             | 49.603 | barcode        | 86.667 |
| bill             | 93.366  | breakout           | 82.382 | byline         | 63.751 |
| caption          | 63.347  | correction         | 19.507 | credit         | 54.481 |
| dateline         | 41.799  | drop cap           | 76.069 | figure         | 81.021 |
| flag             | 94.422  | folio              | 76.453 | headline       | 83.541 |
| index            | 80.572  | inside             | 86.799 | jump line      | 65.844 |
| kicker           | 48.362  | lead               | 74.842 | mugshot        | 69.183 |
| ordered list     | 2.106   | page number        | 68.168 | paragraph      | 91.322 |
| play             | 100.000 | section            | 79.960 | sidebar        | 31.977 |
| subhead          | 58.967  | supplementary note | 54.872 | table          | 34.636 |
| table caption    | 14.622  | teasers            | 74.455 | unordered list | 0.000  |
| weather forecast | 100.000 |                    |        |                |        |

Table 17. The performance of TransDLANet on the test paper test set.

| Category                    | AP     | Category                     | AP     | Category                    | AP     |
|-----------------------------|--------|------------------------------|--------|-----------------------------|--------|
| QR code                     | 91.122 | author                       | 59.273 | bracket                     | 69.809 |
| byline                      | 71.388 | caption                      | 51.183 | endnote                     | 30.768 |
| examinee information        | 14.891 | figure                       | 74.224 | first-level question number | 63.711 |
| first-level title           | 76.011 | footer                       | 72.801 | formula                     | 54.910 |
| header                      | 76.675 | headline                     | 59.850 | option                      | 85.754 |
| ordered list                | 75.898 | other question number        | 19.441 | page number                 | 59.033 |
| paragraph                   | 80.328 | part                         | 71.907 | poem                        | 82.214 |
| sealing line                | 24.158 | second-level question number | 65.567 | second-level title          | 76.418 |
| supplementary note          | 63.752 | table                        | 91.735 | table caption               | 39.857 |
| third-level question number | 43.966 | title                        | 81.686 | underscore                  | 53.332 |
| unordered list              | 0.108  |                              |        |                             |        |

Table 18. The performance of TransDLANet on the textbook test set.

| Category           | AP     | Category           | AP     | Category                     | AP     |
|--------------------|--------|--------------------|--------|------------------------------|--------|
| answer             | 17.774 | author             | 30.492 | blank                        | 41.271 |
| bracket            | 64.726 | byline             | 30.133 | caption                      | 65.620 |
| catalogue          | 42.970 | chapter title      | 67.027 | credit                       | 22.500 |
| dateline           | 35.842 | figure             | 69.836 | first-level question number  | 50.457 |
| first-level title  | 73.183 | footer             | 74.969 | footnote                     | 78.615 |
| formula            | 36.004 | fourth-level title | 18.654 | header                       | 72.671 |
| headline           | 71.452 | index              | 66.639 | lead                         | 81.441 |
| marginal note      | 77.873 | matching           | 22.620 | option                       | 50.744 |
| ordered list       | 22.818 | page number        | 58.093 | paragraph                    | 73.979 |
| part               | 73.818 | poem               | 29.581 | second-level question number | 56.581 |
| second-level title | 0.345  | section            | 74.510 | section title                | 72.277 |
| sub section title  | 69.981 | subhead            | 53.934 | supplementary note           | 24.827 |
| table              | 76.178 | table caption      | 54.939 | third-level question number  | 0.000  |
| third-level title  | 46.164 | underscore         | 54.956 | unordered list               | 63.386 |

The main reason for the low overall accuracy of our model is that we have fixed the number of queries in advance. Therefore, if there are multiple queries corresponding to a single instance, our model may fail to detect all the instances in the images. It is worth noting that the visualization results of PubLayNet inference also show some tilt detection errors, which may be caused by noise in the PubLayNet dataset.

Table 19. The performance of TransDLANet on the book test set.

| Category             | AP     | Category                     | AP     | Category           | AP     |
|----------------------|--------|------------------------------|--------|--------------------|--------|
| QR code              | 0.000  | answer                       | 0.000  | author             | 28.297 |
| bracket              | 19.010 | byline                       | 2.574  | caption            | 40.736 |
| catalogue            | 0.000  | chapter title                | 21.729 | code               | 30.138 |
| drop cap             | nan    | endnote                      | 10.575 | fifth-level title  | 0.085  |
| figure               | 55.424 | first-level question number  | 23.994 | first-level title  | 46.635 |
| footer               | 47.277 | footnote                     | 0.000  | formula            | 21.660 |
| fourth-level title   | 7.271  | header                       | 69.067 | headline           | 25.235 |
| index                | 83.414 | institute                    | 47.772 | jump line          | 0.000  |
| marginal note        | 52.954 | option                       | 17.763 | ordered list       | 10.103 |
| page number          | 56.186 | paragraph                    | 60.591 | poem               | 0.000  |
| reference            | 64.406 | second-level question number | 9.172  | second-level title | 0.671  |
| section              | 38.086 | section title                | 40.258 | sub section title  | 42.836 |
| subsub section title | 24.022 | supplementary note           | 0.000  | table              | 58.094 |
| table caption        | 41.820 | third-level title            | 28.857 | title              | 75.264 |
| underscore           | 0.000  | unordered list               | 14.470 |                    |        |

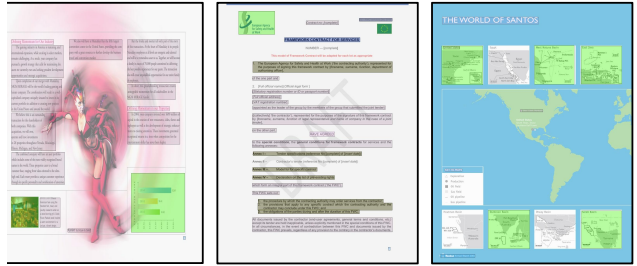

Figure 3. Failure Cases of DocLayNet datasets.

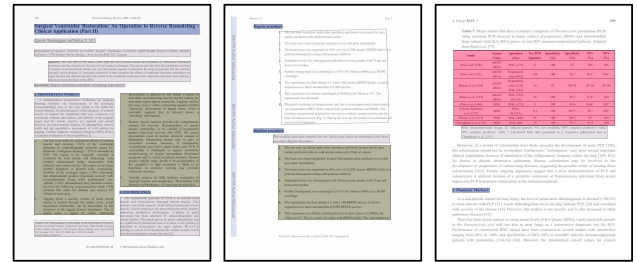

Figure 4. Failure Cases of PubLayNet datasets.

## H. Annotation samples of $M^6Doc$

Figure 5 shows annotation samples of  $M^6Doc$  dataset. There are a total of 74 annotation categories in our dataset. Among them, scientific article, textbook, book, test paper, magazine\_ch, magazine\_en, newspaper\_ch, newspaer\_en, and note subsets with 25, 42, 44, 31, 22, 24, 27, 34, and 18 categories, respectively. Detailed category statistics of the training, validation, and test sets for the nine subsets are shown in Tables 20, 21, 22, 23, 24, 25, 26, 27, and 28.



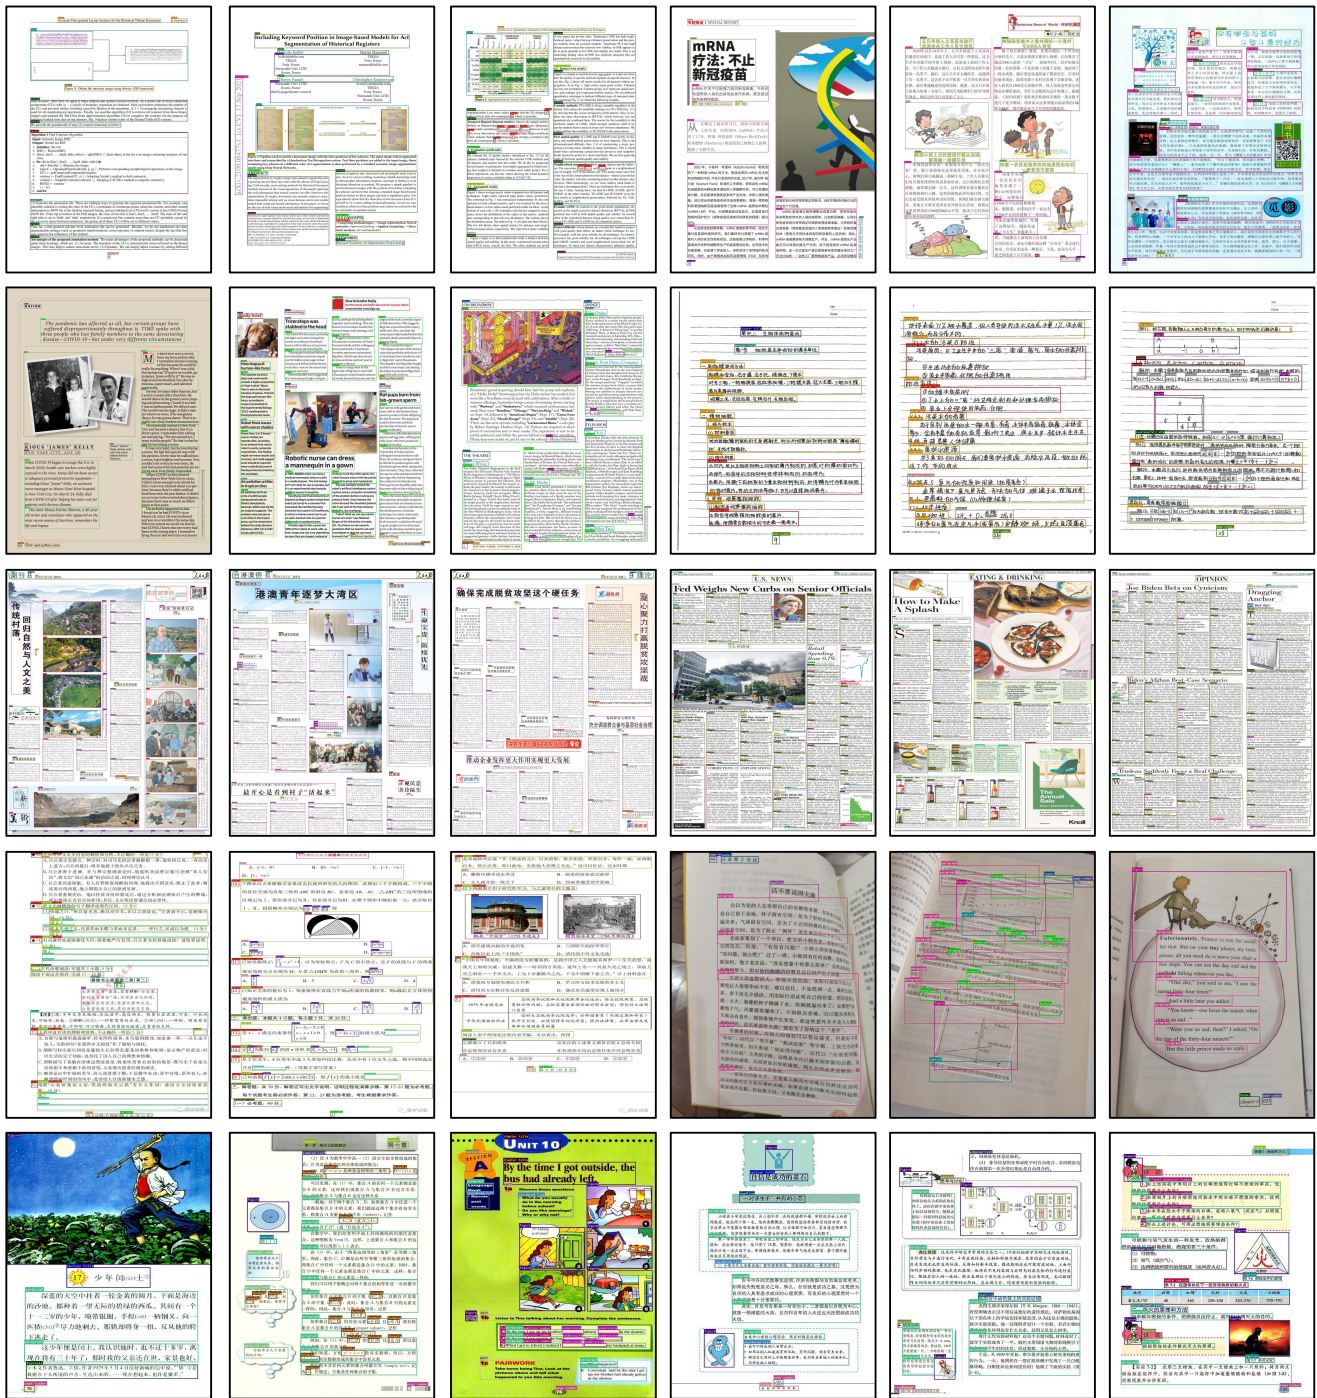

Figure 5. Example annotations of the  $M^6$  Doc. Zoom in for better view.

Table 20. Scientific article subset overview.

| Category                   | Training    |            | Validate    |            | Testing     |            |
|----------------------------|-------------|------------|-------------|------------|-------------|------------|
|                            | Number      | %          | Number      | %          | Number      | %          |
| algorithm                  | 12          | 0.14       | 3           | 0.21       | 12          | 0.28       |
| author                     | 51          | 0.62       | 8           | 0.56       | 29          | 0.67       |
| caption                    | 371         | 4.48       | 64          | 4.51       | 174         | 4.03       |
| code                       | 2           | 0.02       | 2           | 0.14       | 1           | 0.02       |
| drop cap                   | 2           | 0.02       | 1           | 0.07       | 1           | 0.02       |
| figure                     | 368         | 4.44       | 63          | 4.44       | 184         | 4.26       |
| footer                     | 32          | 0.39       | 7           | 0.49       | 17          | 0.39       |
| footnote                   | 128         | 1.54       | 18          | 1.27       | 65          | 1.51       |
| formula                    | 2081        | 25.11      | 363         | 25.60      | 1106        | 25.62      |
| fourth-level section title | 15          | 0.18       | 3           | 0.21       | 19          | 0.44       |
| header                     | 219         | 2.64       | 31          | 2.19       | 131         | 3.03       |
| institute                  | 49          | 0.59       | 8           | 0.56       | 24          | 0.56       |
| marginal note              | 40          | 0.48       | 5           | 0.35       | 20          | 0.46       |
| ordered list               | 54          | 0.65       | 12          | 0.85       | 38          | 0.88       |
| page number                | 369         | 4.45       | 59          | 4.16       | 175         | 4.05       |
| paragraph                  | 2916        | 35.18      | 522         | 36.81      | 1551        | 35.93      |
| reference                  | 134         | 1.62       | 20          | 1.41       | 57          | 1.32       |
| section title              | 432         | 5.21       | 76          | 5.36       | 221         | 5.12       |
| sub section title          | 412         | 4.97       | 71          | 5.01       | 191         | 4.42       |
| subsub section title       | 80          | 0.97       | 17          | 1.20       | 48          | 1.11       |
| table                      | 181         | 2.18       | 22          | 1.55       | 88          | 2.04       |
| table caption              | 177         | 2.14       | 19          | 1.34       | 80          | 1.85       |
| table note                 | 8           | 0.10       | 2           | 0.14       | 5           | 0.12       |
| title                      | 46          | 0.56       | 6           | 0.42       | 25          | 0.58       |
| unordered list             | 109         | 1.32       | 16          | 1.13       | 55          | 1.27       |
| <b>Total</b>               | <b>8288</b> | <b>100</b> | <b>1418</b> | <b>100</b> | <b>4317</b> | <b>100</b> |

Table 21. Textbook subset overview.

| Category                     | Training     |            | Validate    |            | Testing      |            |
|------------------------------|--------------|------------|-------------|------------|--------------|------------|
|                              | Number       | %          | Number      | %          | Number       | %          |
| answer                       | 27           | 0.12       | 8           | 0.22       | 20           | 0.18       |
| author                       | 25           | 0.11       | 7           | 0.19       | 13           | 0.12       |
| blank                        | 189          | 0.81       | 58          | 1.59       | 90           | 0.80       |
| bracket                      | 237          | 1.01       | 34          | 0.93       | 74           | 0.66       |
| byline                       | 34           | 0.15       | 8           | 0.22       | 32           | 0.29       |
| caption                      | 867          | 3.71       | 157         | 4.31       | 423          | 3.77       |
| catalogue                    | 7            | 0.03       | 3           | 0.08       | 4            | 0.04       |
| chapter title                | 164          | 0.70       | 23          | 0.63       | 82           | 0.73       |
| credit                       | 1            | 0.00       | 1           | 0.03       | 1            | 0.01       |
| dateline                     | 11           | 0.05       | 3           | 0.08       | 3            | 0.03       |
| figure                       | 2239         | 9.57       | 375         | 10.29      | 1106         | 9.87       |
| first-level question number  | 1634         | 6.98       | 245         | 6.72       | 695          | 6.20       |
| first-level title            | 158          | 0.68       | 15          | 0.41       | 74           | 0.66       |
| footer                       | 480          | 2.05       | 85          | 2.33       | 241          | 2.15       |
| footnote                     | 158          | 0.68       | 26          | 0.71       | 69           | 0.62       |
| formula                      | 2164         | 9.25       | 304         | 8.34       | 1031         | 9.20       |
| fourth-level title           | 7            | 0.03       | 8           | 0.22       | 15           | 0.13       |
| header                       | 434          | 1.85       | 64          | 1.76       | 224          | 2.00       |
| headline                     | 494          | 2.11       | 91          | 2.50       | 240          | 2.14       |
| index                        | 97           | 0.41       | 15          | 0.41       | 47           | 0.42       |
| lead                         | 46           | 0.20       | 12          | 0.33       | 22           | 0.20       |
| marginal note                | 165          | 0.71       | 29          | 0.80       | 75           | 0.67       |
| matching                     | 7            | 0.03       | 1           | 0.03       | 8            | 0.07       |
| option                       | 110          | 0.47       | 12          | 0.33       | 33           | 0.29       |
| ordered list                 | 159          | 0.68       | 22          | 0.60       | 71           | 0.63       |
| page number                  | 1183         | 5.06       | 193         | 5.29       | 590          | 5.26       |
| paragraph                    | 8223         | 35.14      | 1245        | 34.15      | 3999         | 35.68      |
| part                         | 412          | 1.76       | 70          | 1.92       | 219          | 1.95       |
| poem                         | 39           | 0.17       | 9           | 0.25       | 19           | 0.17       |
| second-level question number | 676          | 2.89       | 48          | 1.32       | 295          | 2.63       |
| second-level title           | 2            | 0.01       | 1           | 0.03       | 1            | 0.01       |
| section                      | 921          | 3.94       | 153         | 4.20       | 470          | 4.19       |
| section title                | 223          | 0.95       | 51          | 1.40       | 88           | 0.79       |
| sub section title            | 31           | 0.13       | 6           | 0.16       | 14           | 0.12       |
| subhead                      | 93           | 0.40       | 22          | 0.60       | 43           | 0.38       |
| supplementary note           | 21           | 0.09       | 2           | 0.05       | 16           | 0.14       |
| table                        | 273          | 1.17       | 51          | 1.40       | 136          | 1.21       |
| table caption                | 44           | 0.19       | 5           | 0.14       | 16           | 0.14       |
| third-level question number  | 11           | 0.05       | 1           | 0.03       | 7            | 0.06       |
| third-level title            | 50           | 0.21       | 18          | 0.49       | 35           | 0.31       |
| underscore                   | 1066         | 4.56       | 125         | 3.43       | 438          | 3.91       |
| unordered list               | 217          | 0.93       | 40          | 1.10       | 130          | 1.16       |
| <b>Total</b>                 | <b>23399</b> | <b>100</b> | <b>3646</b> | <b>100</b> | <b>11209</b> | <b>100</b> |

Table 22. Newspaper\_ch subset overview.

| Category           | Training     |            | Validate    |            | Testing      |            |
|--------------------|--------------|------------|-------------|------------|--------------|------------|
|                    | Number       | %          | Number      | %          | Number       | %          |
| QR code            | 12           | 0.05       | 6           | 0.16       | 11           | 0.09       |
| advertisement      | 28           | 0.12       | 10          | 0.27       | 21           | 0.18       |
| author             | 1622         | 7.03       | 260         | 7.03       | 808          | 6.91       |
| byline             | 2            | 0.01       | 1           | 0.03       | 11           | 0.09       |
| caption            | 375          | 1.63       | 70          | 1.89       | 199          | 1.70       |
| credit             | 390          | 1.69       | 73          | 1.97       | 201          | 1.72       |
| dateline           | 562          | 2.44       | 87          | 2.35       | 277          | 2.37       |
| editor's note      | 39           | 0.17       | 4           | 0.11       | 9            | 0.08       |
| figure             | 797          | 3.46       | 124         | 3.35       | 389          | 3.33       |
| flag               | 20           | 0.09       | 4           | 0.11       | 9            | 0.08       |
| folio              | 598          | 2.59       | 100         | 2.70       | 301          | 2.57       |
| footer             | 224          | 0.97       | 18          | 0.49       | 90           | 0.77       |
| headline           | 1327         | 5.75       | 212         | 5.73       | 643          | 5.50       |
| index              | 4            | 0.02       | 1           | 0.03       | 3            | 0.03       |
| jump line          | 128          | 0.56       | 19          | 0.51       | 54           | 0.46       |
| kicker             | 359          | 1.56       | 68          | 1.84       | 169          | 1.45       |
| lead               | 193          | 0.84       | 34          | 0.92       | 88           | 0.75       |
| mugshot            | 13           | 0.06       | 4           | 0.11       | 6            | 0.05       |
| ordered list       | 83           | 0.36       | 17          | 0.46       | 40           | 0.34       |
| page number        | 280          | 1.21       | 46          | 1.24       | 140          | 1.20       |
| paragraph          | 14520        | 62.96      | 2281        | 61.63      | 7430         | 63.56      |
| section            | 284          | 1.23       | 46          | 1.24       | 142          | 1.21       |
| sidebar            | 3            | 0.01       | 3           | 0.08       | 3            | 0.03       |
| subhead            | 1034         | 4.48       | 188         | 5.08       | 573          | 4.90       |
| supplementary note | 146          | 0.63       | 21          | 0.57       | 65           | 0.56       |
| teasers            | 12           | 0.05       | 1           | 0.03       | 4            | 0.03       |
| unordered list     | 8            | 0.03       | 3           | 0.08       | 4            | 0.03       |
| <b>Total</b>       | <b>23063</b> | <b>100</b> | <b>3701</b> | <b>100</b> | <b>11690</b> | <b>100</b> |

Table 23. Newspaper\_en subset overview.

| Category           | Training     |            | Validate    |            | Testing      |            |
|--------------------|--------------|------------|-------------|------------|--------------|------------|
|                    | Number       | %          | Number      | %          | Number       | %          |
| advertisement      | 154          | 0.73       | 25          | 0.75       | 92           | 0.88       |
| author             | 133          | 0.63       | 28          | 0.84       | 66           | 0.63       |
| barcode            | 10           | 0.05       | 1           | 0.03       | 3            | 0.03       |
| bill               | 3            | 0.01       | 2           | 0.06       | 3            | 0.03       |
| breakout           | 298          | 1.42       | 49          | 1.47       | 139          | 1.34       |
| byline             | 839          | 3.99       | 109         | 3.26       | 369          | 3.55       |
| caption            | 634          | 3.02       | 97          | 2.90       | 340          | 3.27       |
| correction         | 9            | 0.04       | 1           | 0.03       | 6            | 0.06       |
| credit             | 567          | 2.70       | 97          | 2.90       | 278          | 2.67       |
| dateline           | 151          | 0.72       | 23          | 0.69       | 78           | 0.75       |
| drop cap           | 188          | 0.89       | 30          | 0.90       | 118          | 1.13       |
| figure             | 799          | 3.80       | 127         | 3.80       | 416          | 4.00       |
| flag               | 10           | 0.05       | 1           | 0.03       | 3            | 0.03       |
| folio              | 844          | 4.02       | 113         | 3.38       | 384          | 3.69       |
| headline           | 986          | 4.69       | 147         | 4.40       | 454          | 4.36       |
| index              | 83           | 0.39       | 13          | 0.39       | 30           | 0.29       |
| inside             | 16           | 0.08       | 1           | 0.03       | 5            | 0.05       |
| jump line          | 252          | 1.20       | 43          | 1.29       | 125          | 1.20       |
| kicker             | 157          | 0.75       | 23          | 0.69       | 88           | 0.85       |
| lead               | 201          | 0.96       | 29          | 0.87       | 71           | 0.68       |
| mugshot            | 60           | 0.29       | 7           | 0.21       | 40           | 0.38       |
| ordered list       | 6            | 0.03       | 4           | 0.12       | 4            | 0.04       |
| page number        | 290          | 1.38       | 49          | 1.47       | 149          | 1.43       |
| paragraph          | 13435        | 63.92      | 2142        | 64.13      | 6680         | 64.21      |
| play               | 10           | 0.05       | 3           | 0.09       | 2            | 0.02       |
| section            | 343          | 1.63       | 63          | 1.89       | 168          | 1.61       |
| sidebar            | 48           | 0.23       | 6           | 0.18       | 21           | 0.20       |
| subhead            | 215          | 1.02       | 30          | 0.90       | 96           | 0.92       |
| supplementary note | 172          | 0.82       | 31          | 0.93       | 99           | 0.95       |
| table              | 55           | 0.26       | 25          | 0.75       | 43           | 0.41       |
| table caption      | 13           | 0.06       | 11          | 0.33       | 25           | 0.24       |
| teasers            | 20           | 0.10       | 6           | 0.18       | 3            | 0.03       |
| unordered list     | 6            | 0.03       | 1           | 0.03       | 3            | 0.03       |
| weather forecast   | 10           | 0.05       | 3           | 0.09       | 3            | 0.03       |
| <b>Total</b>       | <b>21017</b> | <b>100</b> | <b>3340</b> | <b>100</b> | <b>10404</b> | <b>100</b> |



Table 24. Book subset overview.

| Category                     | Training    |            | Validate   |            | Testing     |            |
|------------------------------|-------------|------------|------------|------------|-------------|------------|
|                              | Number      | %          | Number     | %          | Number      | %          |
| QR code                      | 3           | 0.05       | 1          | 0.10       | 3           | 0.11       |
| answer                       | 4           | 0.07       | 1          | 0.10       | 1           | 0.04       |
| author                       | 15          | 0.27       | 1          | 0.10       | 4           | 0.15       |
| bracket                      | 11          | 0.20       | 1          | 0.10       | 4           | 0.15       |
| byline                       | 5           | 0.09       | 1          | 0.10       | 3           | 0.11       |
| caption                      | 77          | 1.37       | 12         | 1.25       | 33          | 1.24       |
| catalogue                    | 2           | 0.04       | 1          | 0.10       | 1           | 0.04       |
| chapter title                | 40          | 0.71       | 5          | 0.52       | 17          | 0.64       |
| code                         | 60          | 1.07       | 5          | 0.52       | 30          | 1.13       |
| drop cap                     | 1           | 0.02       | 0          | 0.00       | 0           | 0.00       |
| endnote                      | 5           | 0.09       | 2          | 0.21       | 6           | 0.23       |
| fifth-level title            | 13          | 0.23       | 2          | 0.21       | 20          | 0.75       |
| figure                       | 113         | 2.01       | 18         | 1.88       | 50          | 1.88       |
| first-level question number  | 156         | 2.78       | 39         | 4.06       | 51          | 1.92       |
| first-level title            | 24          | 0.43       | 3          | 0.31       | 23          | 0.86       |
| footer                       | 50          | 0.89       | 8          | 0.83       | 27          | 1.01       |
| footnote                     | 4           | 0.07       | 1          | 0.10       | 1           | 0.04       |
| formula                      | 1330        | 23.67      | 250        | 26.04      | 527         | 19.80      |
| fourth-level title           | 63          | 1.12       | 5          | 0.52       | 51          | 1.92       |
| header                       | 206         | 3.67       | 36         | 3.75       | 102         | 3.83       |
| headline                     | 53          | 0.94       | 3          | 0.31       | 30          | 1.13       |
| index                        | 30          | 0.53       | 7          | 0.73       | 20          | 0.75       |
| institute                    | 11          | 0.20       | 1          | 0.10       | 4           | 0.15       |
| jump line                    | 1           | 0.02       | 1          | 0.10       | 1           | 0.04       |
| marginal note                | 33          | 0.59       | 3          | 0.31       | 6           | 0.23       |
| option                       | 15          | 0.27       | 1          | 0.10       | 6           | 0.23       |
| ordered list                 | 141         | 2.51       | 19         | 1.98       | 76          | 2.86       |
| page number                  | 273         | 4.86       | 45         | 4.69       | 140         | 5.26       |
| paragraph                    | 2156        | 38.38      | 353        | 36.77      | 1050        | 39.46      |
| poem                         | 6           | 0.11       | 1          | 0.10       | 1           | 0.04       |
| reference                    | 15          | 0.27       | 3          | 0.31       | 5           | 0.19       |
| second-level question number | 103         | 1.83       | 16         | 1.67       | 30          | 1.13       |
| second-level title           | 4           | 0.07       | 2          | 0.21       | 2           | 0.08       |
| section                      | 148         | 2.63       | 23         | 2.40       | 78          | 2.93       |
| section title                | 99          | 1.76       | 13         | 1.35       | 59          | 2.22       |
| sub section title            | 79          | 1.41       | 21         | 2.19       | 35          | 1.32       |
| subsub section title         | 21          | 0.37       | 4          | 0.42       | 23          | 0.86       |
| supplementary note           | 3           | 0.05       | 0          | 0.00       | 1           | 0.04       |
| table                        | 81          | 1.44       | 14         | 1.46       | 41          | 1.54       |
| table caption                | 26          | 0.46       | 3          | 0.31       | 11          | 0.41       |
| third-level title            | 96          | 1.71       | 26         | 2.71       | 59          | 2.22       |
| title                        | 11          | 0.20       | 1          | 0.10       | 4           | 0.15       |
| underscore                   | 15          | 0.27       | 3          | 0.31       | 10          | 0.38       |
| unordered list               | 16          | 0.28       | 5          | 0.52       | 15          | 0.56       |
| <b>Total</b>                 | <b>5618</b> | <b>100</b> | <b>960</b> | <b>100</b> | <b>2661</b> | <b>100</b> |

Table 25. Magazine.ch subset overview.

| Category           | Training     |            | Validate    |            | Testing     |            |
|--------------------|--------------|------------|-------------|------------|-------------|------------|
|                    | Number       | %          | Number      | %          | Number      | %          |
| QR code            | 33           | 0.29       | 6           | 0.32       | 5           | 0.09       |
| advertisement      | 2            | 0.02       | 1           | 0.05       | 1           | 0.02       |
| author             | 421          | 3.71       | 73          | 3.89       | 182         | 3.28       |
| byline             | 12           | 0.11       | 2           | 0.11       | 37          | 0.67       |
| caption            | 397          | 3.50       | 53          | 2.82       | 206         | 3.72       |
| credit             | 271          | 2.39       | 42          | 2.24       | 120         | 2.17       |
| figure             | 1020         | 9.00       | 168         | 8.95       | 488         | 8.81       |
| footer             | 311          | 2.74       | 52          | 2.77       | 162         | 2.92       |
| header             | 369          | 3.25       | 56          | 2.98       | 181         | 3.27       |
| headline           | 491          | 4.33       | 82          | 4.37       | 214         | 3.86       |
| ordered list       | 2            | 0.02       | 1           | 0.05       | 5           | 0.09       |
| page number        | 569          | 5.02       | 95          | 5.06       | 285         | 5.14       |
| paragraph          | 6542         | 57.69      | 1076        | 57.33      | 3234        | 58.36      |
| poem               | 15           | 0.13       | 3           | 0.16       | 2           | 0.04       |
| section            | 218          | 1.92       | 33          | 1.76       | 107         | 1.93       |
| subhead            | 499          | 4.40       | 109         | 5.81       | 231         | 4.17       |
| supplementary note | 60           | 0.53       | 9           | 0.48       | 28          | 0.51       |
| table              | 5            | 0.04       | 1           | 0.05       | 1           | 0.02       |
| translator         | 73           | 0.64       | 11          | 0.59       | 38          | 0.69       |
| unordered list     | 29           | 0.26       | 4           | 0.21       | 14          | 0.25       |
| <b>Total</b>       | <b>11339</b> | <b>100</b> | <b>1877</b> | <b>100</b> | <b>5541</b> | <b>100</b> |

Table 26. Test paper subset overview.

| Category                     | Training     |            | Validate    |            | Testing      |            |
|------------------------------|--------------|------------|-------------|------------|--------------|------------|
|                              | Number       | %          | Number      | %          | Number       | %          |
| QR code                      | 4            | 0.01       | 1           | 0.02       | 3            | 0.02       |
| author                       | 54           | 0.16       | 4           | 0.07       | 18           | 0.11       |
| bracket                      | 615          | 1.79       | 129         | 2.33       | 195          | 1.16       |
| byline                       | 114          | 0.33       | 18          | 0.32       | 75           | 0.45       |
| caption                      | 445          | 1.29       | 97          | 1.75       | 223          | 1.32       |
| endnote                      | 30           | 0.09       | 2           | 0.04       | 13           | 0.08       |
| examinee information         | 8            | 0.02       | 2           | 0.04       | 6            | 0.04       |
| figure                       | 1373         | 3.99       | 220         | 3.97       | 681          | 4.05       |
| first-level question number  | 3879         | 11.28      | 646         | 11.64      | 1994         | 11.84      |
| first-level title            | 404          | 1.17       | 63          | 1.14       | 195          | 1.16       |
| footer                       | 312          | 0.91       | 46          | 0.83       | 168          | 1.00       |
| formula                      | 7064         | 20.54      | 1040        | 18.75      | 3319         | 19.71      |
| header                       | 386          | 1.12       | 64          | 1.15       | 192          | 1.14       |
| headline                     | 187          | 0.54       | 18          | 0.32       | 71           | 0.42       |
| option                       | 3046         | 8.86       | 496         | 8.94       | 1530         | 9.09       |
| ordered list                 | 314          | 0.91       | 57          | 1.03       | 152          | 0.90       |
| other question number        | 42           | 0.12       | 3           | 0.05       | 31           | 0.18       |
| page number                  | 979          | 2.85       | 174         | 3.14       | 490          | 2.91       |
| paragraph                    | 9268         | 26.94      | 1480        | 26.68      | 4602         | 27.34      |
| part                         | 109          | 0.32       | 17          | 0.31       | 62           | 0.37       |
| poem                         | 28           | 0.08       | 2           | 0.04       | 9            | 0.05       |
| sealing line                 | 3            | 0.01       | 2           | 0.04       | 5            | 0.03       |
| second-level question number | 1994         | 5.80       | 313         | 5.64       | 1005         | 5.97       |
| second-level title           | 267          | 0.78       | 45          | 0.81       | 137          | 0.81       |
| supplementary note           | 304          | 0.88       | 53          | 0.96       | 145          | 0.86       |
| table                        | 157          | 0.46       | 27          | 0.49       | 65           | 0.39       |
| table caption                | 27           | 0.08       | 3           | 0.05       | 11           | 0.07       |
| third-level question number  | 229          | 0.67       | 35          | 0.63       | 95           | 0.56       |
| title                        | 144          | 0.42       | 28          | 0.50       | 71           | 0.42       |
| underscore                   | 2606         | 7.58       | 462         | 8.33       | 1269         | 7.54       |
| unordered list               | 5            | 0.01       | 1           | 0.02       | 3            | 0.02       |
| <b>Total</b>                 | <b>34397</b> | <b>100</b> | <b>5548</b> | <b>100</b> | <b>16835</b> | <b>100</b> |

Table 27. Magazine.en subset overview.

| Category           | Training     |            | Validate    |            | Testing     |            |
|--------------------|--------------|------------|-------------|------------|-------------|------------|
|                    | Number       | %          | Number      | %          | Number      | %          |
| QR code            | 7            | 0.06       | 1           | 0.05       | 1           | 0.02       |
| advertisement      | 73           | 0.61       | 9           | 0.44       | 31          | 0.51       |
| author             | 103          | 0.87       | 22          | 1.07       | 68          | 1.12       |
| breakout           | 113          | 0.95       | 23          | 1.12       | 49          | 0.81       |
| byline             | 270          | 2.27       | 46          | 2.24       | 133         | 2.20       |
| caption            | 321          | 2.70       | 51          | 2.48       | 151         | 2.50       |
| credit             | 294          | 2.47       | 42          | 2.05       | 128         | 2.12       |
| dateline           | 177          | 1.49       | 27          | 1.32       | 124         | 2.05       |
| drop cap           | 223          | 1.88       | 40          | 1.95       | 115         | 1.90       |
| figure             | 843          | 7.10       | 137         | 6.67       | 410         | 6.78       |
| footer             | 474          | 3.99       | 79          | 3.85       | 235         | 3.89       |
| footnote           | 5            | 0.04       | 4           | 0.19       | 4           | 0.07       |
| header             | 263          | 2.21       | 46          | 2.24       | 139         | 2.30       |
| headline           | 577          | 4.86       | 90          | 4.38       | 329         | 5.44       |
| lead               | 224          | 1.89       | 34          | 1.66       | 104         | 1.72       |
| ordered list       | 25           | 0.21       | 1           | 0.05       | 7           | 0.12       |
| page number        | 535          | 4.50       | 90          | 4.38       | 265         | 4.38       |
| paragraph          | 6338         | 53.35      | 1134        | 55.24      | 3242        | 53.61      |
| poem               | 10           | 0.08       | 3           | 0.15       | 2           | 0.03       |
| section            | 565          | 4.76       | 88          | 4.29       | 254         | 4.20       |
| sidebar            | 3            | 0.03       | 1           | 0.05       | 3           | 0.05       |
| subhead            | 157          | 1.32       | 45          | 2.19       | 126         | 2.08       |
| supplementary note | 272          | 2.29       | 39          | 1.90       | 124         | 2.05       |
| unordered list     | 9            | 0.08       | 1           | 0.05       | 3           | 0.05       |
| <b>Total</b>       | <b>11881</b> | <b>100</b> | <b>2053</b> | <b>100</b> | <b>6047</b> | <b>100</b> |

Table 28. Note subset overview.

| Category           | Training    |            | Validate   |            | Testing     |            |
|--------------------|-------------|------------|------------|------------|-------------|------------|
|                    | Number      | %          | Number     | %          | Number      | %          |
| answer             | 134         | 3.32       | 21         | 3.15       | 56          | 2.59       |
| caption            | 21          | 0.52       | 4          | 0.60       | 17          | 0.79       |
| catalogue          | 30          | 0.74       | 6          | 0.90       | 14          | 0.65       |
| chapter title      | 41          | 1.02       | 5          | 0.75       | 25          | 1.16       |
| figure             | 62          | 1.54       | 10         | 1.50       | 38          | 1.76       |
| footer             | 101         | 2.50       | 15         | 2.25       | 47          | 2.17       |
| formula            | 451         | 11.17      | 101        | 15.14      | 208         | 9.62       |
| option             | 27          | 0.67       | 6          | 0.90       | 8           | 0.37       |
| ordered list       | 228         | 5.65       | 39         | 5.85       | 117         | 5.41       |
| page number        | 304         | 7.53       | 52         | 7.80       | 149         | 6.89       |
| paragraph          | 2244        | 55.57      | 342        | 51.27      | 1281        | 59.25      |
| part               | 3           | 0.07       | 2          | 0.30       | 2           | 0.09       |
| section            | 29          | 0.72       | 2          | 0.30       | 9           | 0.42       |
| section title      | 143         | 3.54       | 31         | 4.65       | 74          | 3.42       |
| sub section title  | 45          | 1.11       | 9          | 1.35       | 29          | 1.34       |
| supplementary note | 8           | 0.20       | 3          | 0.45       | 9           | 0.42       |
| table              | 69          | 1.71       | 6          | 0.90       | 35          | 1.62       |
| unordered list     | 98          | 2.43       | 13         | 1.95       | 44          | 2.04       |
| <b>Total</b>       | <b>4038</b> | <b>100</b> | <b>667</b> | <b>100</b> | <b>2162</b> | <b>100</b> |
